# Supplementary material for: Redescription and Phylogenetic Analysis of the Mandible of an Enigmatic Pennsylvanian (Late Carboniferous) Tetrapod from Nova Scotia, and the Lability of Meckelian Jaw Ossification
Source: PLoS One. 2014 Oct 7;9(10):e109717. doi: 10.1371/journal.pone.0109717 (PMC4188710; doi:10.1371/journal.pone.0109717)
Supplement: Matrix S2 — Matrix of Clack et al. (2012) including the Parrsboro jaw, scored with denticulated element below anterior coronoid interpreted as splenial. Corresponds to “matrix 2” in the text and to Figs. 1C and 2C. (NEX) [file pone.0109717.s003.nex]

#NEXUS
[written Tue Jul 08 16:35:24 BST 2014 by Mesquite  version 2.75 (build 564) at COLLES-11585/147.188.171.79]

BEGIN TAXA;
	TITLE Taxa;
	DIMENSIONS NTAX=25;
	TAXLABELS
		Acanthostega Balanerpeton Baphetes Crassigyrinus Dendrerpeton Densignathus Elginerpeton Elpistostege Eoherpeton Eusthenopteron Greererpeton Ichthyostega Metaxygnathus Panderichthys Pederpes Proterogyrinus Silvanerpeton Tiktaalik Ventastega Whatcheeria Ymeria Parrsboro_jaw Caerorhachis Sigournea Occidens 
	;

END;


BEGIN CHARACTERS;
	TITLE  Character_Matrix;
	DIMENSIONS  NCHAR=115;
	FORMAT DATATYPE = STANDARD GAP = - MISSING = ? SYMBOLS = "  0 1 2 3";
	MATRIX
	Acanthostega    000111111000111?0101?011110001000001000000011000?100011110100101001100001100100010111111011111011001111010202011112
	Balanerpeton    2101100011?0210110111011??101011110000111112121??0101?111?20001120200?101111?00111?002202111211110011111102?2?11112
	Baphetes        010110??101011011101?01111100011110000111????????????????????????????????????????0010?200111?111100??1?1??????11112
	Crassigyrinus   1000100?111021011101?0????10?0001000000000020000001003111?100001001??1121111?101101101110121?1111??11111110???11111
	Dendrerpeton    100110001?10210110111111111(0 1)10110100011111(1 2)21??110101?1?1?11??1111??0?111111?0?11????220211121111001111111022?11112
	Densignathus    ?????????????????????????????????????????0011000?10000010000110?001000000000100?101111????31????1??????????????????
	Elginerpeton    ????????????0????????????????????0?0???????1?00??0010001010011000011???11000000?001111????11?11??11????????0?1?????
	Elpistostege    0???1?100?001?1??0????????10???????0?????????????00000?????????0??????0????????????????0?00????????????????????????
	Eoherpeton      200?10111?01?101111???11?111?0002110?????12?100??0101?111?10??111?1?1212110110?01????2?10120???1100??11111022??1112
	Eusthenopteron  00000000000000000000??00000000000000000000010000?00000000000000000000?0000000010000000000000000000?0000000000?00010
	Greererpeton    21011(0 1)001000211011010011111010002001011101221001101001011?11000100100?120101100110110211111121011001111110112?11112
	Ichthyostega    01011111?10001110101?011?1000(0 1)002011001000001000?1000?1100000101001?000011001002101112000111?10111112111111021?1001
	Metaxygnathus   ?????????????????????????????????????????0000000?10001010000?10?001000000100100?101111????31???????????????????????
	Panderichthys   000?1000000000000000?000000000000000000000000000?00000000000000000000?000000000000000000010000000??0?0001?101?0000?
	Pederpes        ?10110001000?10101?1??1??110?001200?????????????????????????????????????????????????????0111?1111011211110112?11112
	Proterogyrinus  20001000100121011111?11???11?0100000?????1221????0101?111?11001111?11?12???1?0001????2?00121?1111001?11111022?11112
	Silvanerpeton   21001000101121011111?11???10???111000011111??000?0101?111?10??11???00??11111?0?01????220012121111011211111022?11112
	Tiktaalik       ????1?1???00?11?0000??00?0000???0?00?????0000000?00000?000?0000??0000???0000000?10?0?0?0010000000??0?0?0???010?0000
	Ventastega      ?0??10111000111?0101?01101000??0000100?000001000?10000010000110000110000010010001010210101111110?0011?1????020?????
	Whatcheeria     200010111?0021010101?11??11??000200100110100100100000201000000010011010211001002101011?00131?1011011211?11122??1112
	Ymeria          ?101??????00??????0??0???????00?20?100?0?00(1 2)?000?100021?0000??010??0?00?010000001011110?0?31???????????????????????
	Parrsboro_jaw   ?????????????????????????????????????????12?1?01????????1?0??00????01???1111?00?100103????1????????????????????????
	Caerorhachis    ?10010????00??0?110100????10?011010?0111112?10010???1???1010001?1?100?111111?1001001002021112??1?00??11?110???1????
	Sigournea       ?????????????????????????????????????????1021001??00021?10?0??0100100?111100100?10???2????20???????????????????????
	Occidens        ????????????????????????????????????????????1?0??01002???10???010?????1?010010??1?????????20???????????????????????

;

END;
BEGIN ASSUMPTIONS;
	TYPESET * UNTITLED   =  unord:  1 -  115;

END;

BEGIN MESQUITECHARMODELS;
	ProbModelSet * UNTITLED   =  'Mk1 (est.)':  1 -  115;
END;

Begin MESQUITE;
		MESQUITESCRIPTVERSION 2;
		TITLE AUTO;
		tell ProjectCoordinator;
		timeSaved 1404833725290;
		getEmployee #mesquite.minimal.ManageTaxa.ManageTaxa;
		tell It;
			setID 0 4055295680331855279;
			tell It;
				setDefaultOrder  0 1 2 3 4 5 6 7 8 9 10 11 12 13 14 15 16 17 18 19 20 28 22 23 24;
				attachments ;
			endTell;
		endTell;
		getEmployee #mesquite.charMatrices.ManageCharacters.ManageCharacters;
		tell It;
			setID 0 4285566824736814171;
			mqVersion 275;
			checksumv 0 3 1106149955 null  getNumChars 115 numChars 115 getNumTaxa 25 numTaxa 25   short true   bits 15   states 15   sumSquaresStatesOnly 6289.0 sumSquares 6289.0 longCompressibleToShort false usingShortMatrix true   NumFiles 1 NumMatrices 1;
			mqVersion;
		endTell;
		getWindow;
		tell It;
			suppress;
			setResourcesState false false 100;
			setPopoutState 400;
			setExplanationSize 0;
			setAnnotationSize 0;
			setFontIncAnnot 0;
			setFontIncExp 0;
			setSize 854 830;
			setLocation 8 8;
			setFont SanSerif;
			setFontSize 10;
			getToolPalette;
			tell It;
			endTell;
			desuppress;
		endTell;
		getEmployee  #mesquite.minimal.ManageTaxa.ManageTaxa;
		tell It;
			showTaxa #4055295680331855279 #mesquite.lists.TaxonList.TaxonList;
			tell It;
				setTaxa #4055295680331855279;
				getWindow;
				tell It;
					newAssistant  #mesquite.lists.DefaultTaxaOrder.DefaultTaxaOrder;
					newAssistant  #mesquite.lists.TaxonListCurrPartition.TaxonListCurrPartition;
					getTable;
					tell It;
						rowNamesWidth 130;
					endTell;
					setExplanationSize 30;
					setAnnotationSize 20;
					setFontIncAnnot 0;
					setFontIncExp 0;
					setSize 754 763;
					setLocation 8 8;
					setFont SanSerif;
					setFontSize 10;
					getToolPalette;
					tell It;
						setTool mesquite.lists.TaxonList.TaxonListWindow.ibeam;
					endTell;
				endTell;
				showWindow;
				getEmployee #mesquite.lists.ColorTaxon.ColorTaxon;
				tell It;
					setColor Red;
					removeColor off;
				endTell;
				getEmployee #mesquite.lists.TaxonListAnnotPanel.TaxonListAnnotPanel;
				tell It;
					togglePanel off;
				endTell;
			endTell;
		endTell;
		getEmployee  #mesquite.charMatrices.BasicDataWindowCoord.BasicDataWindowCoord;
		tell It;
			showDataWindow #4285566824736814171 #mesquite.charMatrices.BasicDataWindowMaker.BasicDataWindowMaker;
			tell It;
				getWindow;
				tell It;
					setExplanationSize 30;
					setAnnotationSize 20;
					setFontIncAnnot 0;
					setFontIncExp 0;
					setSize 754 763;
					setLocation 8 8;
					setFont SanSerif;
					setFontSize 10;
					getToolPalette;
					tell It;
					endTell;
					setActive;
					setTool mesquite.charMatrices.BasicDataWindowMaker.BasicDataWindow.arrow;
					colorCells  #mesquite.charMatrices.NoColor.NoColor;
					colorRowNames  #mesquite.charMatrices.TaxonGroupColor.TaxonGroupColor;
					colorColumnNames  #mesquite.charMatrices.CharGroupColor.CharGroupColor;
					colorText  #mesquite.charMatrices.NoColor.NoColor;
					setBackground White;
					toggleShowNames on;
					toggleShowTaxonNames on;
					toggleTight off;
					toggleThinRows off;
					toggleShowChanges on;
					toggleSeparateLines off;
					toggleShowStates on;
					toggleAutoWCharNames on;
					toggleAutoTaxonNames off;
					toggleShowDefaultCharNames off;
					toggleConstrainCW on;
					toggleBirdsEye off;
					toggleShowPaleGrid off;
					toggleShowPaleCellColors off;
					togglePaleInapplicable on;
					toggleShowBoldCellText off;
					toggleAllowAutosize on;
					toggleColorsPanel off;
					toggleDiagonal on;
					setDiagonalHeight 80;
					toggleLinkedScrolling on;
					toggleScrollLinkedTables off;
				endTell;
				showWindow;
				getWindow;
				tell It;
					forceAutosize;
				endTell;
				getEmployee #mesquite.charMatrices.ColorByState.ColorByState;
				tell It;
					setStateLimit 9;
					toggleUniformMaximum on;
				endTell;
				getEmployee #mesquite.charMatrices.ColorCells.ColorCells;
				tell It;
					setColor Red;
					removeColor off;
				endTell;
				getEmployee #mesquite.categ.StateNamesStrip.StateNamesStrip;
				tell It;
					showStrip off;
				endTell;
				getEmployee #mesquite.charMatrices.AnnotPanel.AnnotPanel;
				tell It;
					togglePanel off;
				endTell;
				getEmployee #mesquite.charMatrices.CharReferenceStrip.CharReferenceStrip;
				tell It;
					showStrip off;
				endTell;
				getEmployee #mesquite.charMatrices.QuickKeySelector.QuickKeySelector;
				tell It;
					autotabOff;
				endTell;
				getEmployee #mesquite.charMatrices.SelSummaryStrip.SelSummaryStrip;
				tell It;
					showStrip off;
				endTell;
				getEmployee #mesquite.categ.SmallStateNamesEditor.SmallStateNamesEditor;
				tell It;
					panelOpen true;
				endTell;
			endTell;
		endTell;
		endTell;
end;
